# Supplementary material for: Carbon sequestration in managed temperate coniferous forests under climate change
Source: Copernicus journal article supplement (doi:10.5194/bg-13-1933-2016), 2016-03-30
Supplement: Supplementary file 1 [file bg-13-1933-2016-supplement.pdf]

Supplement of Biogeosciences, 13, 1933–1947, 2016  
<http://www.biogeosciences.net/13/1933/2016/>  
doi:10.5194/bg-13-1933-2016-supplement  
© Author(s) 2016. CC Attribution 3.0 License.

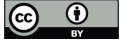

*Supplement of*

## **Carbon sequestration in managed temperate coniferous forests under climate change**

**Caren C. Dymond et al.**

*Correspondence to:* Caren C. Dymond (caren.dymond@gov.bc.ca)

The copyright of individual parts of the supplement might differ from the CC-BY 3.0 licence.

Supplementary to Dymond et al Pine Creek climate change modelling.

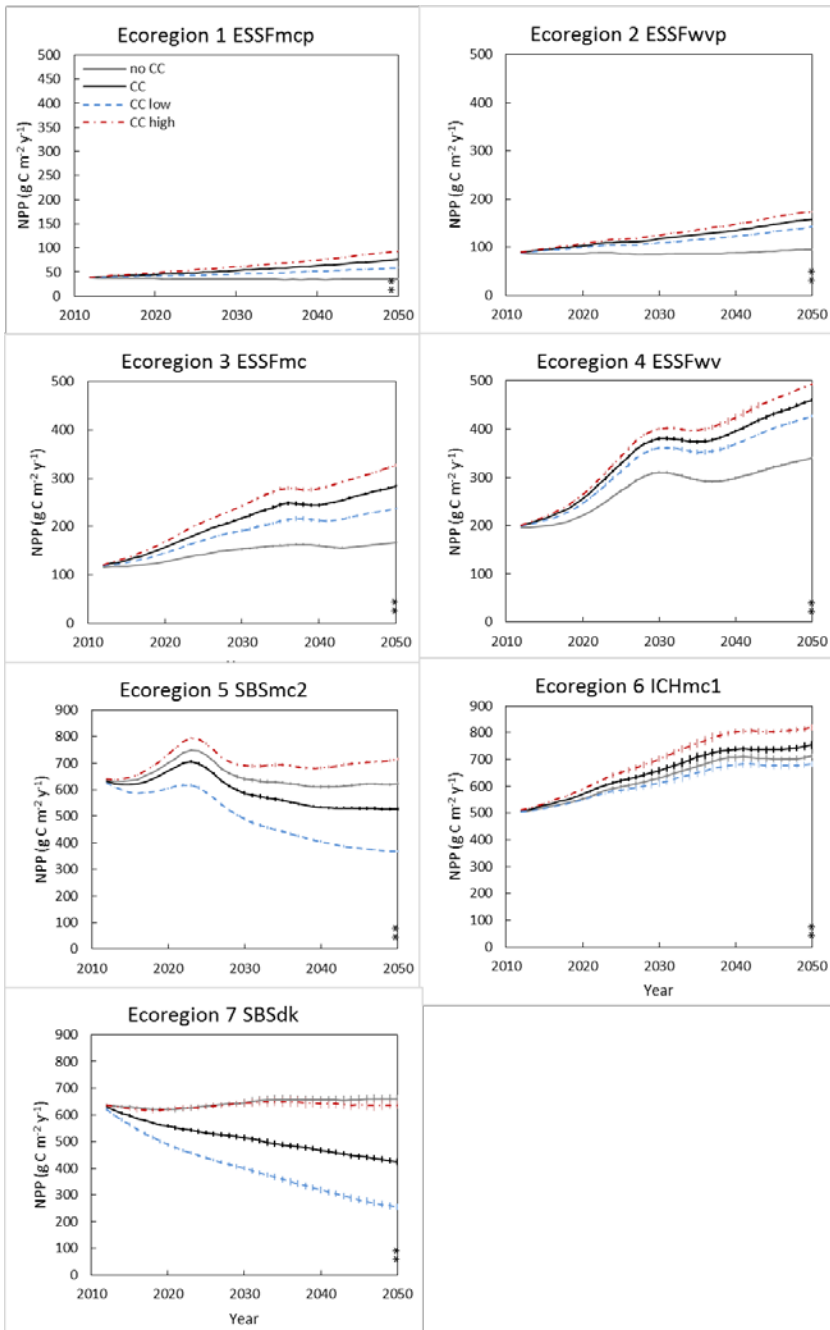

Figure S1 Climate change projections of the NPP (average  $\pm$  SD) rates for each ecoregion. Asterisk notes t-tests that were significantly different between the no change scenario and average productivity scenario (\*\*  $P < 0.01$ ) in 2050. Note, y-axes vary.

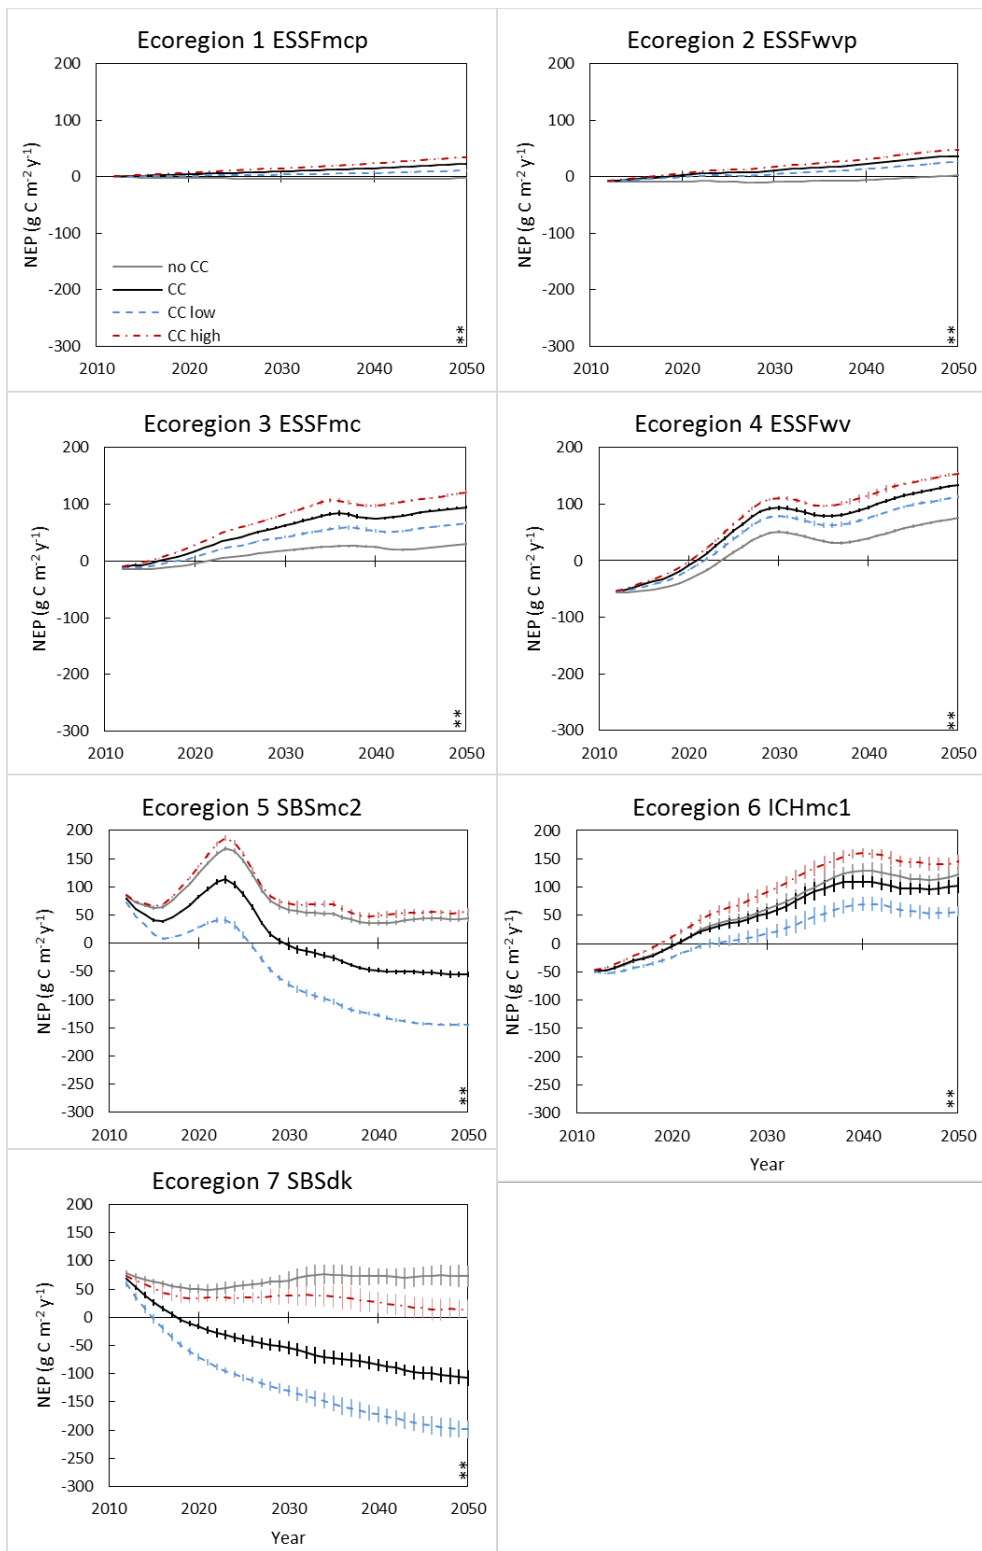

Figure 2 Climate change impact projections on the NEP (average  $\pm$  SD) rates for each ecoregion. Asterisk notes t-tests that were significantly different between the no change scenario and climate change average productivity (\*\*  $P < 0.01$ ) in 2050. Note, y-axes vary.

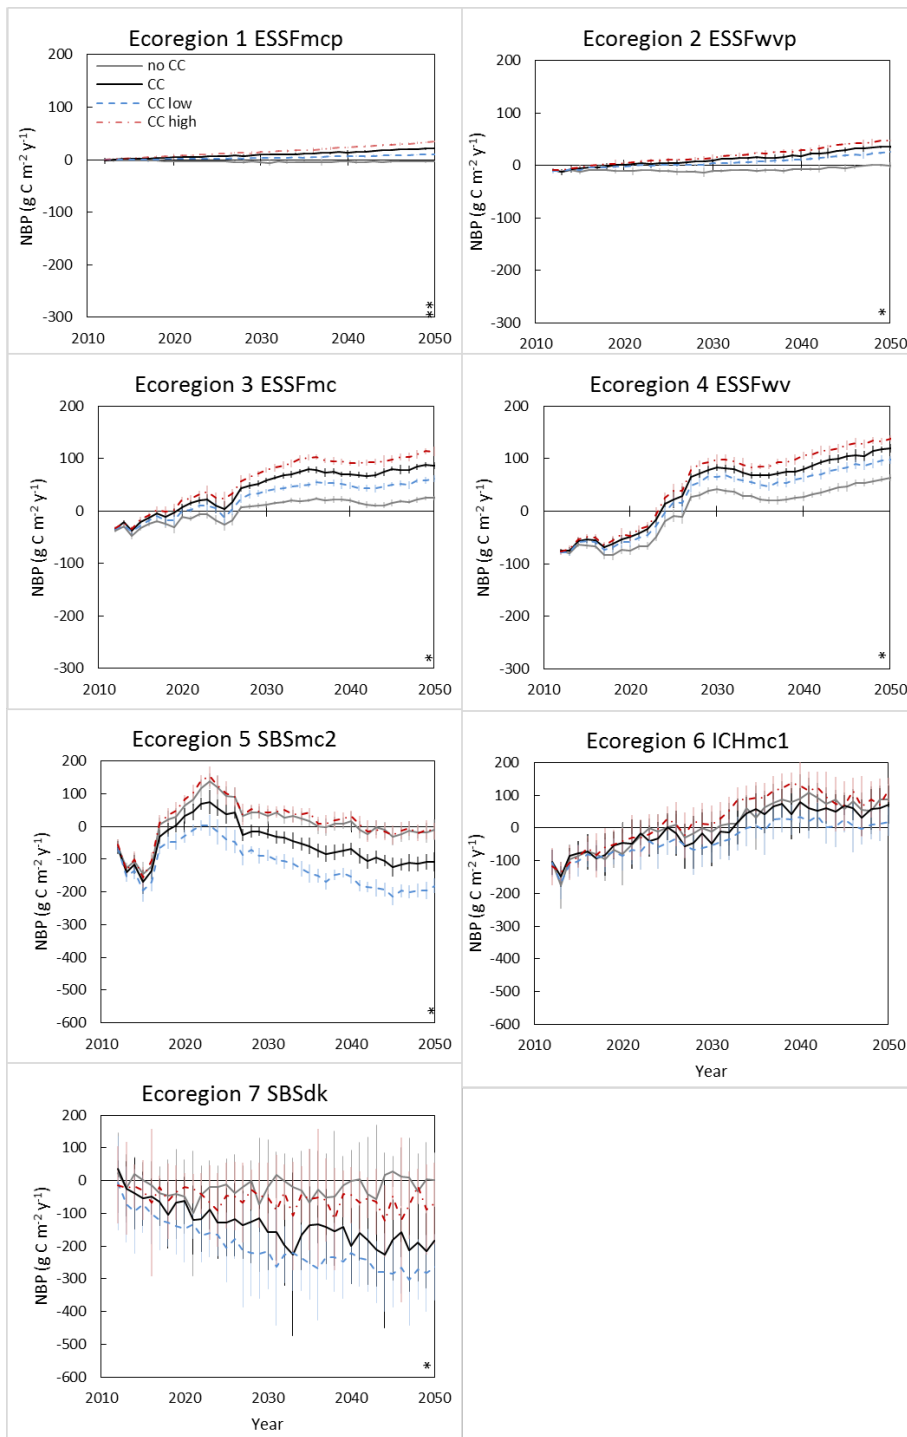

Figure 3 Climate change impact projections on the NBP (average  $\pm$  SD) rates for each ecoregion. Asterisk notes t-tests that were significantly different between the no change scenario and climate change average productivity (\*\*  $P < 0.01$ , \*  $P < 0.05$ ) in 2050. Note, y-axes vary.

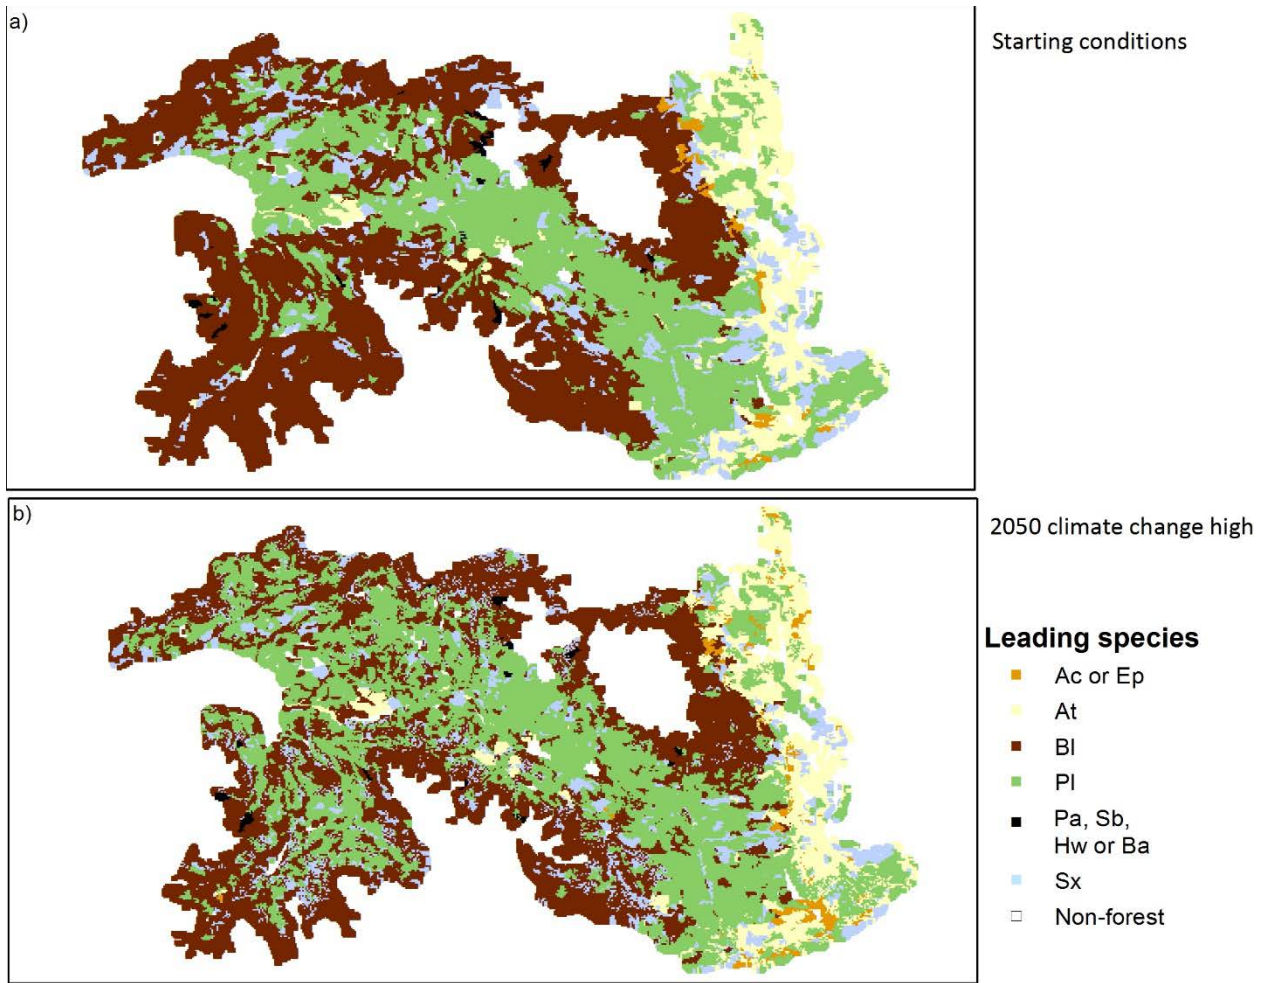

Figure 4 Leading species distribution with starting conditions or in 2050 under the high productivity scenario.
